# Supplementary material for: Generation of hypoxia-sensing chimeric antigen receptor T cells
Source: PubMed Central journal article supplement (PMC8353489; doi:10.1016/j.xpro.2021.100723), 2021-08-06
Supplement: mmc1.pdf [file mmc1.pdf]

**Panel A b.p. sequence**

5'-AGACTGCCATG...  
 GCCCCAGCCGCTGGAGACACAATCATATCTTTAGATTTGGCAGCAACGACACAGAACTGATGACCAGCAACTTGAGGAAGTACCATTATATAATGATGTAATGCTCCCTCACCC  
 AACGAAAAATTACAGAATATAAATTTGGCAATGTCTCCATTACCACCGCTGAAACGCCAAAGCCACTTCGAAGTAGTGCTGACCTGCACTCAATCAAGAAGTTGCATTAATAA  
 GAACCAATCCAGAGTCACTGGAACCTTTCTTTACCATGCCCAAGATTGAGGATCAGACACCTAGTCCTCCGATGGAAGCACTAGACAAAGTTCACTGAGCCTAATAGTCCAGT  
 GAATATTGTTTTATGTGGATAGTGATATGGTCAATGAAITCAAGTTGGAATGGTAGAAAACTTTTGTGCTGAAGACACAGAAGCAAGAACCCATTTTCTACTCAGGACACAGAT  
 TTAGACTTGGAGATGTTAGTCCCTATATCCAATGGATGATGACTTCCAGTTACGTTCCCTCGATCAGTTGTCACCATTAGAAAGCAGTTCCGCAAGCCCTGAAAGCGCAAGTCCTC  
 AAAGCACAGTTACAGTATCCAGTAACAGCCACTCGAGGATCCG-3'

Annotations:

Enzyme Recognition Site

Start codon

... = CAR or protein of interest sequence (left to right, from N- to C-terminus)

ODD

EcoRI site (unused) and suggested b.p. to mutate to remove if it will pose an issue for downstream cloning

Stop codon

6b.p. overhang (for efficient restriction endonuclease cleavage)

**Panel B amino acid sequence**

APAAGDTIISLDFGSNDTETDDQQLLEEVPLYNDVMLPSPNEKLNINLAMSPLETPK  
 PLRSSADPALNQEVALKLEPNPESLELSFTMPQIQDQTPSPSDGSTRQSSPEPNSPSEYC  
 FVVDSDMVNEFKLELVEKLFADTEAKNPFSTQDSDLLEMLAPYIPMDDDFQLRSFDQL  
 SPLESSASPESAPQSTVTVFQ

**Figure S2. ODD sequences.** Related to Fig. 3. **A)** Synthetic ODD fragment DNA sequence. The boxed codon within the purple ODD region (GAA) represented part of an EcoRI site that may cause issues should the user need to further modify the HRE cassette after incorporating the CAR-ODD into the SFG vector (as the HRE promoter insertion uses and EcoRI cleavage site). Should this potentially be needed, we recommend mutating the highlighted site to [GAG] to avoid the EcoRI site but maintain the a.a. sequence of the ODD protein when translated. **B)** Amino acid sequence of human HIF1 $\alpha$  ODD (a.a. 401-603).
